# Supplementary material for: Detection, Transmission, and Characterization of Grapevine Virus H in Croatia
Source: MDPI journal article supplement (doi:10.3390/pathogens10121578), 2021-12-03
Supplement: s1 [file s1]

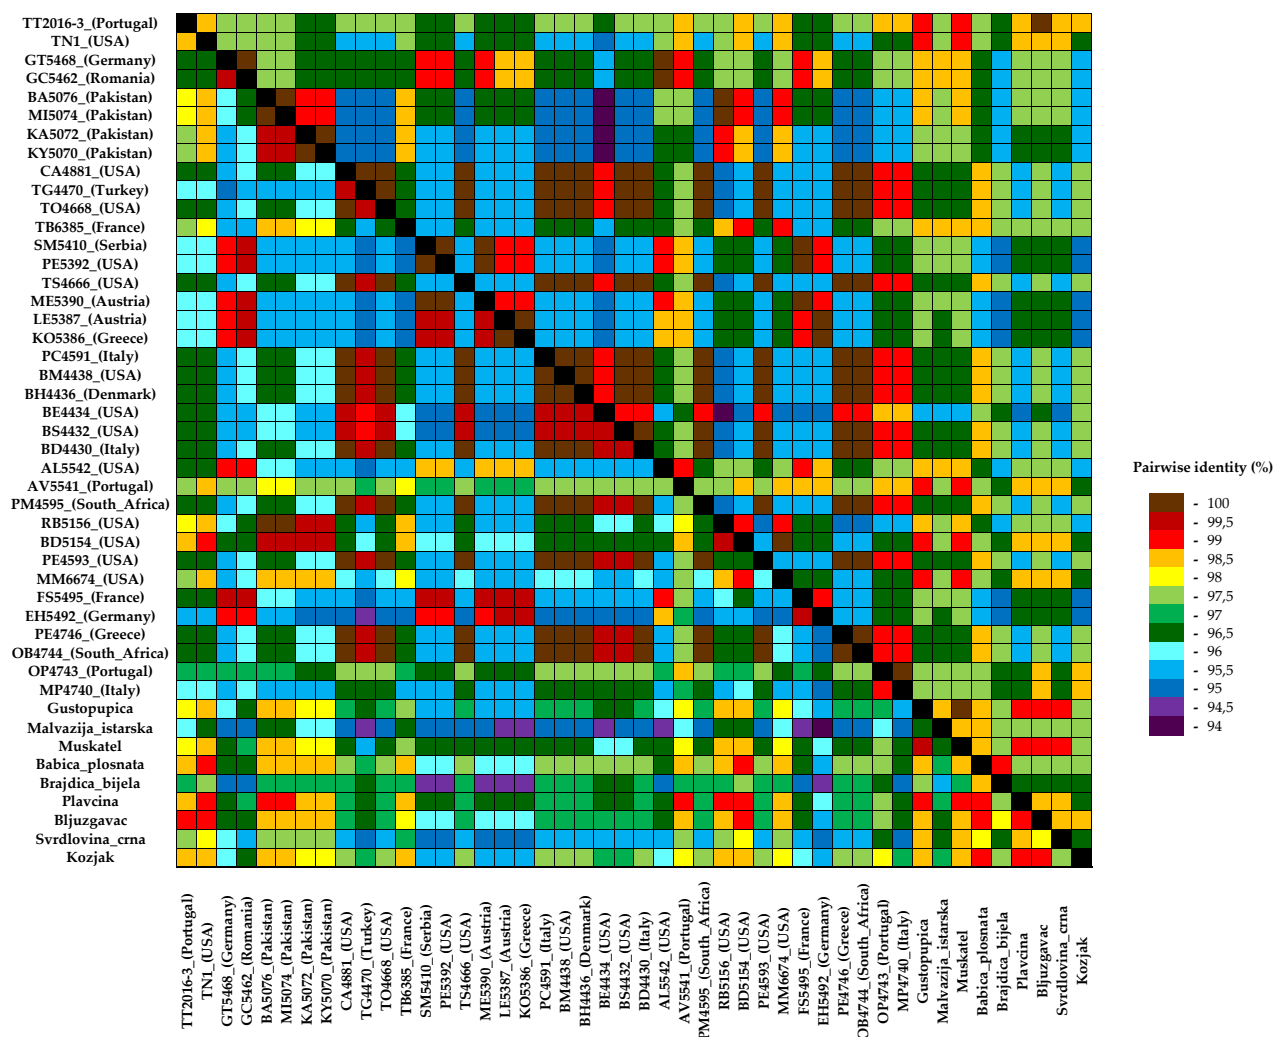

**Supplementary Figure S4.** Estimates of evolutionary divergence between Croatian GVH isolates and those from the GenBank based on the 356 nts fragment of the RdRP coding sequences using the p-distance (pairwise identity) model: nucleotide level (below diagonal); amino-acid level (above diagonal). Croatian GVH isolates are represented by the corresponding grapevine cultivar names from which they were isolated.
