# Supplementary material for: Detection, Transmission, and Characterization of Grapevine Virus H in Croatia
Source: MDPI journal article supplement (doi:10.3390/pathogens10121578), 2021-12-03
Supplement: s1 [file s1]

**Supplementary Table S1.** Grapevine virus H isolates used for comparison and phylogenetic analyses in replicase (RdRP) and coat protein (CP) regions with their origin and corresponding GenBank accession numbers.

| Isolate  | Country      | Cultivar            | GenBank Acc. No. |             |
|----------|--------------|---------------------|------------------|-------------|
|          |              |                     | RdRp             | CP          |
| TT2016-3 | Portugal     | /                   | NC_040545.1      | NC_040545.1 |
| TN1      | USA          | /                   | MN716768.1       | MN716768.1  |
| GT5468   | Germany      | Gamay Toma          | MK017760.1       | MK838928.1  |
| VR5454   | Germany      | Vranac              | /                | MK838927.1  |
| GC5462   | Romania      | Grassa de Cothari   | MK017758.1       | MK838926.1  |
| BA5076   | Pakistan     | Bargoon             | MK017757.1       | MK838925.1  |
| MI5074   | Pakistan     | Millishun           | MK017756.1       | MK838924.1  |
| KA5072   | Pakistan     | Kabuli              | MK017755.1       | MK838923.1  |
| KY5070   | Pakistan     | Kini Yatch          | MK017754.1       | MK838922.1  |
| CA4881   | USA          | Canner              | MK017753.1       | MK838921.1  |
| TG4470   | Turkey       | Turkish Grape       | MK017752.1       | MK838920.1  |
| TO4668   | USA          | Tokay               | MK017751.1       | MK838919.1  |
| TB6385   | France       | Terret blanc        | MK017750.1       | MK838918.1  |
| SM5410   | Serbia       | Smederevka          | MK017749.1       | MK838917.1  |
| PE5392   | USA          | Perruno             | MK017748.1       | MK838916.1  |
| TS4666   | USA          | Tschilaci           | MK017747.1       | MK838915.1  |
| ME5390   | Austria      | Mezes               | MK017746.1       | MK838914.1  |
| LE5387   | Austria      | Leanyka             | MK017745.1       | MK838913.1  |
| KO5386   | Greece       | Kokinostaphylo      | MK017744.1       | MK838912.1  |
| PC4591   | Italy        | Perla di Csaba      | MK017743.1       | MK838911.1  |
| BM4438   | USA          | Black Monukka       | MK017742.1       | MK838910.1  |
| BH4436   | Denmark      | Black Hamburg       | MK017741.1       | MK838909.1  |
| BE4434   | USA          | Bellino             | MK017740.1       | MK838908.1  |
| BS4432   | USA          | Beauty Seedless     | MK017739.1       | MK838907.1  |
| BD4430   | Italy        | Barone Dell'aterno  | MK017738.1       | MK838906.1  |
| AL5542   | USA          | Aligote             | MK017737.1       | MK838905.1  |
| AV5541   | Portugal     | Alicante Vermelho   | MK017736.1       | MK838904.1  |
| PM4595   | South Africa | Precoce de Malingre | MK017735.1       | MK838903.1  |
| RB5156   | USA          | Rish Baba           | MK017734.1       | MK838902.1  |
| BD5154   | USA          | Black Damascus      | MK017733.1       | MK838901.1  |
| PE4593   | USA          | Perlette            | MK017732.1       | MK838900.1  |
| MM6674   | USA          | Morio Muscat        | MK017731.1       | MK838899.1  |
| FS5495   | France       | Fer Servadou        | MK017730.1       | MK838898.1  |
| EH5492   | Germany      | Ehrenfelser         | MK017729.1       | MK838897.1  |
| PE4746   | Greece       | Petinos             | MK017728.1       | MK838896.1  |
| OB4744   | South Africa | Olivette Bauthette  | MK017727.1       | MK838895.1  |
| OP4743   | Portugal     | Olho de Pargo       | MK017726.1       | MK838894.1  |
| MP4740   | Italy        | Maria Pirovano      | MK017725.1       | MK838893.1  |
