# Supplementary material for: Detection, Transmission, and Characterization of Grapevine Virus H in Croatia
Source: MDPI journal article supplement (doi:10.3390/pathogens10121578), 2021-12-03
Supplement: s1 [file s1]

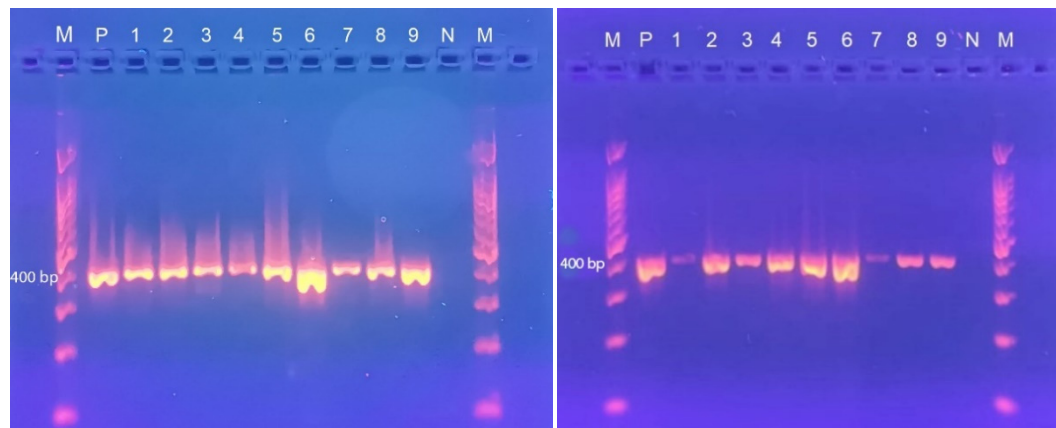

**Supplementary Figure S1.** Agarose gel electrophoresis of RT-PCR products amplified with the one-step RT-PCR protocol using primers targeting the replicase (RdRP - left) and coat protein (CP - right) genes. Expected product size in both cases: 400 base pairs (bp). M- DNA marker (GelPilot 100 bp Plus Ladder, Qiagen, USA), 1–9 samples (cvs. Gustopupica, Malvazija istarska, Muškatel, Babica plosnata, Brajdica bijela, Plavčina, Bljuzgavac, Svrđlovina crna and Kozjak, respectively), N - negative control/virus-free vine.
