# Supplementary material for: Detection, Transmission, and Characterization of Grapevine Virus H in Croatia
Source: MDPI journal article supplement (doi:10.3390/pathogens10121578), 2021-12-03
Supplement: s1 [file s1]

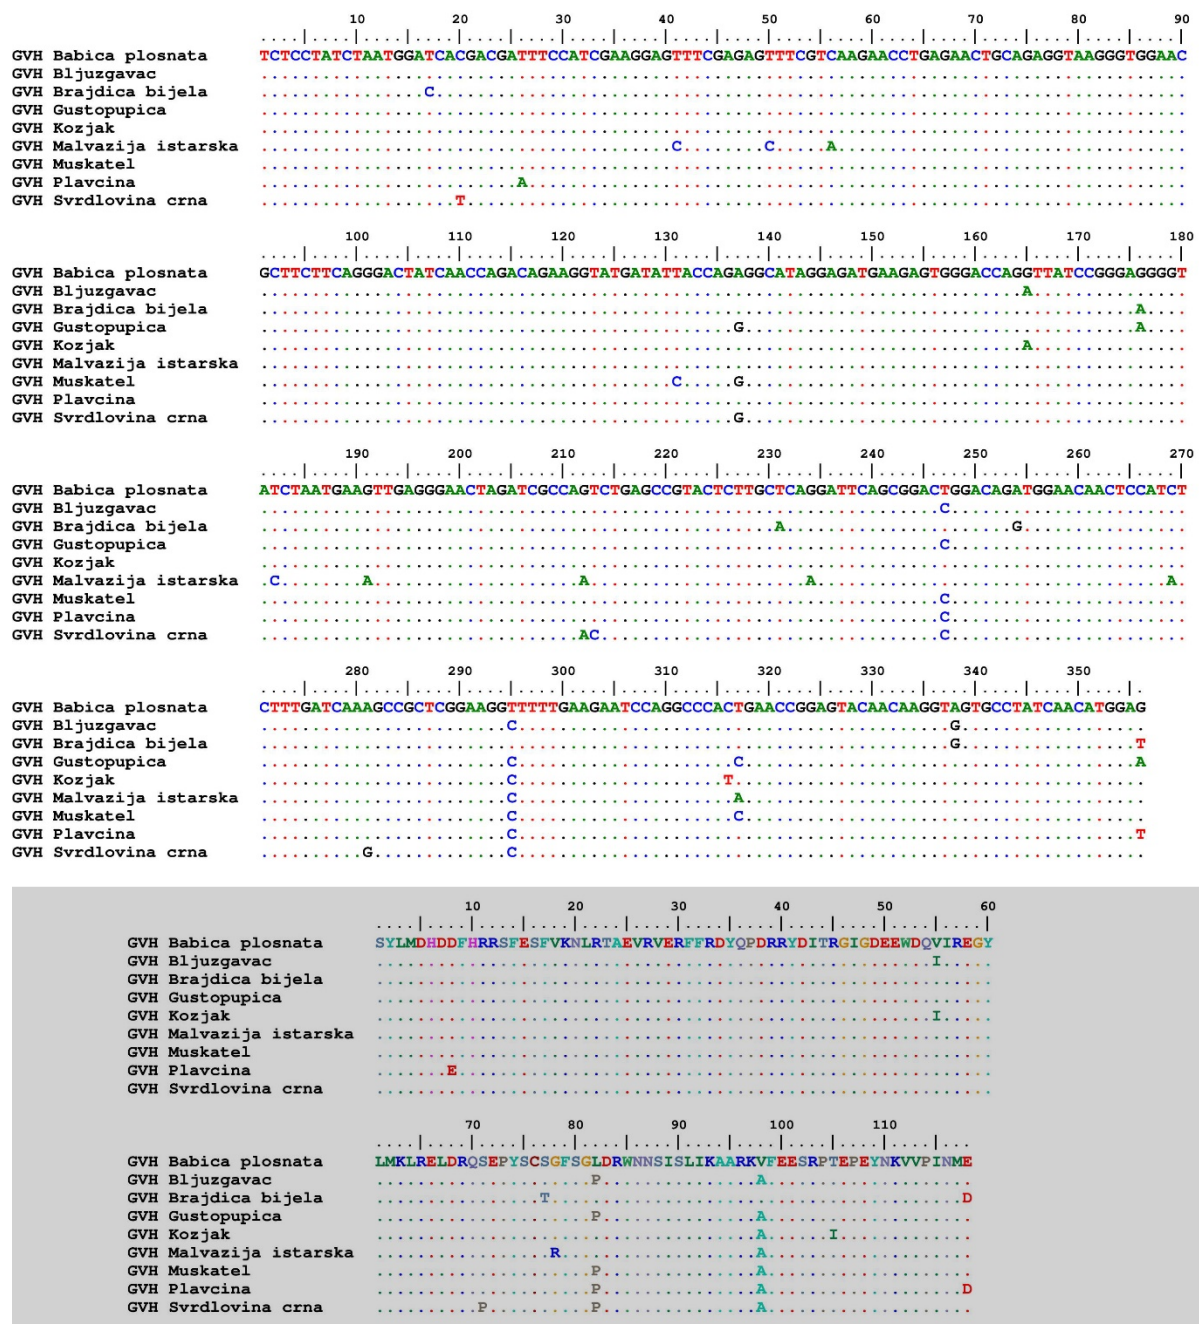

**Supplementary Figure S3.** Multiple alignment of the 356 nt (white) and 118 aa (grey) region of the replicase (RdRP) coding sequences from nine Croatian grapevine virus H (GVH) isolates. The Croatian GVH isolates are represented by the corresponding grapevine cultivar names from which they were isolated.
