# Supplementary material for: Detection, Transmission, and Characterization of Grapevine Virus H in Croatia
Source: MDPI journal article supplement (doi:10.3390/pathogens10121578), 2021-12-03
Supplement: s1 [file s1]

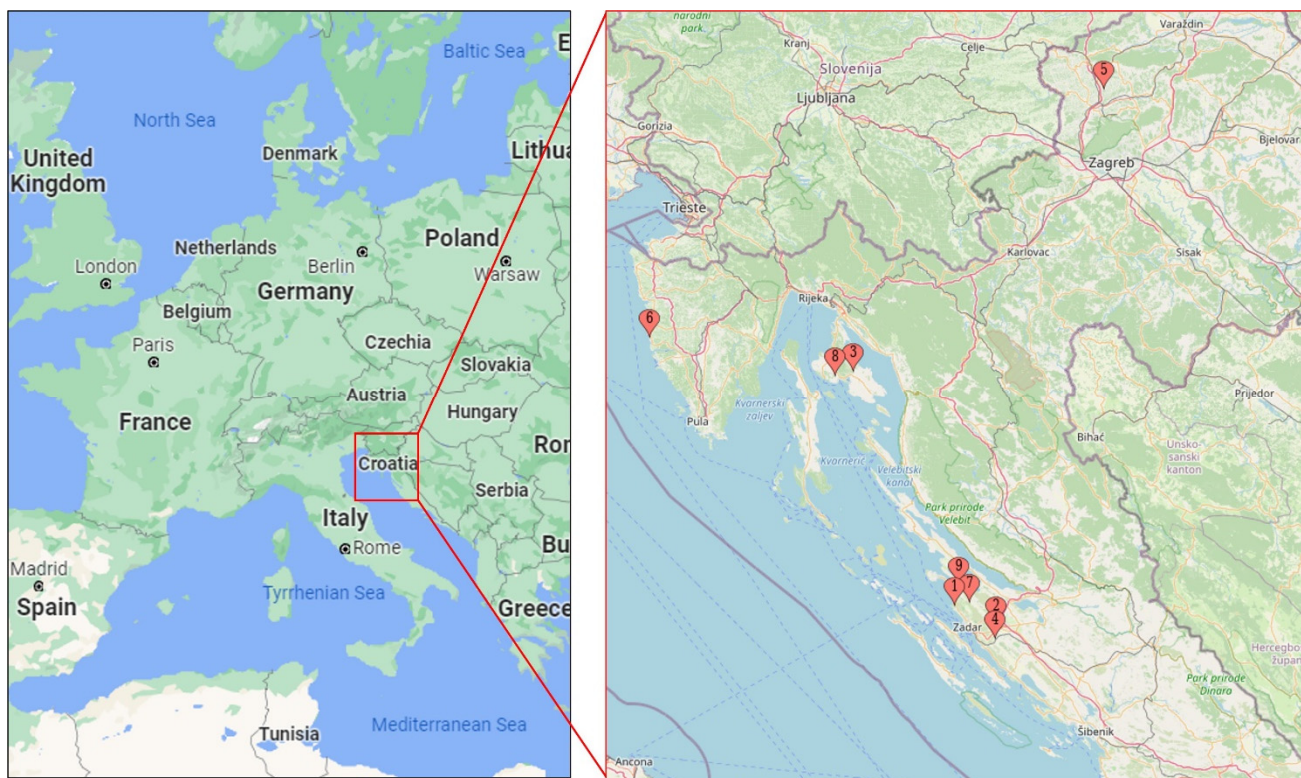

**Supplementary Figure S2.** The geographic origin of the GVH positive grapevine cultivars introduced into the national collection “Jazbina”. The majority of the GVH positive cultivars originated from the Croatian coastal region and only one from the continental region (cv. Kozjak). Numbers on the map correspond to the following cultivars: 1 - Babica plosnata, 2 – Bljuzgavac, 3 - Brajdica bijela, 4 – Gustopupica, 5 – Kozjak, 6 - Malvazija istarska, 7 – Muškotel, 8 – Plavčina and 9 - Svrđlovina crna.
