# Supplementary material for: Detection, Transmission, and Characterization of Grapevine Virus H in Croatia
Source: Pathogens. 2021 Dec 3;10(12):1578. doi: 10.3390/pathogens10121578 (PMC8704696; doi:10.3390/pathogens10121578)
Supplement: Supplementary file 1 [file pathogens-10-01578-s001.zip]

Archive with 7 entries (7 files):
- Supplementary Figure S1_R1.pdf
- Supplementary Figure S2_R3.pdf
- Supplementary Figure S3_R1.pdf
- Supplementary Figure S4_R1.pdf
- Supplementary Figure S5_R1.pdf
- Supplementary Figure S6_R1.pdf
- Supplementary Table S1_R3.pdf
